# Supplementary material for: Evidence of Influenza A Virus Infection in Cynomolgus Macaques, Thailand
Source: MDPI journal article supplement (doi:10.3390/vetsci9030132), 2022-03-13
Supplement: s1 [file vetsci-1604328-supplementary.pdf › vetsci-1604328-supplementary.pdf]

**Table S1.** The number of macaques with seropositive against subtypes of influenza A virus divided by demographic characteristics.

| No | Place*                          | Province      | Date of collection (2019) | Swab sample** | Serum (No) | Sex*** |    |    | Age****   |       |    | Influenza subtypes***** |        |        |        |          |
|----|---------------------------------|---------------|---------------------------|---------------|------------|--------|----|----|-----------|-------|----|-------------------------|--------|--------|--------|----------|
|    |                                 |               |                           |               |            | M      | F  | NA | Sub-adult | Adult | NA | AIV H1                  | AIV H2 | AIV H3 | AIV H9 | Human H1 |
| 1  | Wat Khao Choeng Thain Thepharam | Chon Buri     | March 25-26               | B, R          | 25         | 19     | 6  | -  | 8         | 17    | -  | -                       | -      | -      | -      | -        |
| 2  | Chom Phon Cave                  | Ratchaburi    | March 28                  | NA            | 25         | NA     | NA | 25 | NA        | NA    | 25 | -                       | 4      | -      | 1      | 1        |
| 3  | Wat Khao Somphot                | Lop Buri      | April 4 - 5               | NA            | 29         | 16     | 13 | -  | 6         | 23    | -  | -                       | 7      | -      | -      | -        |
| 4  | Don Chao Pu Botanical Park      | Amnat Charoen | April 8                   | O, R          | 24         | 8      | 16 | -  | NA        | NA    | 24 | -                       | 5      | -      | 1      | -        |
| 5  | Khao Ngu Stone Park             | Ratchaburi    | April 23                  | OP            | 24         | 23     | 1  | -  | 3         | 21    | -  | -                       | 3      | -      | -      | -        |
| 6  | Kosumpho Forest Park            | Maha Sarakham | April 23-24               | O, R          | 25         | 21     | 4  | -  | 13        | 12    | -  | -                       | -      | -      | 5      | 1        |
| 7  | Wat Khao Bandai It              | Phetchaburi   | May 15                    | O, R          | 25         | 20     | 5  | -  | 19        | 6     | -  | -                       | 1      | -      | -      | 1        |
| 8  | Tham Khao Luang                 | Phetchaburi   | May 16                    | O, R          | 25         | 23     | 2  | -  | 7         | 16    | 2  | -                       | -      | -      | -      | -        |
| 9  | Wat Khao Thamon School          | Phetchaburi   | May 21                    | O, R          | 25         | 17     | 8  | -  | 3         | 22    | -  | -                       | -      | -      | 1      | -        |
| 10 | Wat Siri Chanthanimit Worawihan | Lop Buri      | May 22                    | B, R          | 25         | 16     | 9  | -  | 8         | 17    | -  | -                       | 8      | -      | -      | -        |
| 11 | KaoNor-KaoKaew                  | Nakhon Sawan  | May 27                    | B, R          | 25         | 20     | 5  | -  | 10        | 15    | -  | 1                       | 8      | -      | 4      | -        |
| 12 | Wat Khuha Sawan                 | Phatthalung   | May 27-28                 | B, R          | 25         | 16     | 9  | -  | 14        | 11    | -  | -                       | 4      | -      | -      | -        |
| 13 | Wat Pa Sila Wiwek               | Mukdahan      | May 31                    | O, R          | 25         | NA     | NA | 25 | NA        | NA    | 25 | -                       | -      | -      | -      | -        |
| 14 | Mueang SAO                      | Chon Buri     | June 4                    | B, R          | 25         | 22     | 3  | -  | 13        | 12    | -  | 8                       | 10     | 2      | 1      | -        |
| 15 | Wat Khao Samo Khon              | Lop Buri      | June 11                   | B, R          | 26         | 13     | 13 | -  | 6         | 20    | -  | -                       | 5      | -      | -      | -        |
| 16 | Wat Tham Pha Sawan Thammaram    | Nakhon Sawan  | June 24-25                | B, R          | 26         | 20     | 6  | -  | 7         | 19    | -  | -                       | 6      | -      | 2      | -        |
| 17 | Khao To Phaya Wang Park         | Satun         | June 25                   | B, R          | 25         | 17     | 3  | 5  | 14        | 6     | 5  | -                       | -      | -      | -      | -        |
| 18 | Mueangkhaen SAO                 | Si Sa Ket     | June 25                   | NA            | 25         | 2      | 20 | 3  | 0         | 22    | 3  | 1                       | 11     | -      | 1      | 2        |
| 19 | Wat Tham Phra Phothisat         | Saraburi      | July 9                    | B, R          | 25         | 17     | 8  | -  | 10        | 15    | -  | -                       | 11     | -      | 1      | 1        |
| 20 | Wat Tham Mongkhon Khao Changok  | Phetchabun    | July 20                   | B, R          | 26         | 20     | 6  | -  | 12        | 14    | -  | -                       | 12     | -      | 3      | -        |

| No    | Place*                     | Province   | Date of collection (2019) | Swab sample** | Serum (No) | Sex*** |     |    | Age****   |       |    | Influenza subtypes***** |        |        |        |          |
|-------|----------------------------|------------|---------------------------|---------------|------------|--------|-----|----|-----------|-------|----|-------------------------|--------|--------|--------|----------|
|       |                            |            |                           |               |            | M      | F   | NA | Sub-adult | Adult | NA | AIV H1                  | AIV H2 | AIV H3 | AIV H9 | Human H1 |
| 21    | Wat Phrommawatt            | Chon Buri  | August 1-2                | O, R          | 25         | 16     | 9   | -  | 16        | 9     | -  | -                       | 2      | -      | -      | -        |
| 22    | Bang Khun Thian District   | Bangkok    | August 6                  | B, R          | 26         | 19     | 7   | -  | 4         | 22    | -  | 1                       | 4      | -      | 1      | -        |
| 23    | Ao Tha Lane                | Krabi      | August 14                 | B, R          | 25         | 17     | 8   | -  | 11        | 14    | -  | -                       | -      | -      | -      | -        |
| 24    | Ko Lanta Yai               | Krabi      | August 27                 | B, R          | 25         | 18     | 7   | -  | 14        | 11    | -  | -                       | 1      | -      | 1      | -        |
| 25    | Klongtamru SAO             | Chon Buri  | August 26-27              | O, R          | 25         | 21     | 4   | -  | 10        | 15    | -  | -                       | -      | -      | 1      | -        |
| 26    | Thaksin Ratchaniwet Palace | Narathiwat | September 5-6             | B, R          | 18         | 8      | 10  | -  | 6         | 12    | -  | -                       | -      | -      | -      | -        |
| 27    | Bang Tanot SAO             | Ratchaburi | November 19               | O, R          | 23         | 13     | 10  | -  | 19        | 4     | -  | -                       | -      | -      | -      | -        |
| Total |                            |            |                           |               | 672        | 422    | 192 | 58 | 233       | 355   | 84 | 11                      | 102    | 2      | 23     | 6        |
|       |                            |            |                           |               |            |        |     |    |           |       | %  | 1.6                     | 15.2   | 0.3    | 3.4    | 0.9      |

\*: SAO, Subdistrict Administrative Organization.

\*\* : B, buccal swab; R, rectal swab; O, oral swab; OP, Oropharyngeal swab.

\*\*\*: F, Female; M, Male; NA, not available.

\*\*\*\*: Sub-adult was defined as macaque with the age of 1-4 years, while the adult was defined as macaque with age >4 years; NA, not available.

\*\*\*\*\*: Number of individual macaques gave seropositive with HI and NT titers of  $\geq 20$ . AIV, avian influenza virus; Human, human influenza virus.

**Table S2.** Demographic and HI/NT antibody titers of 128 individual macaques with seropositive against subtypes of influenza A virus

| No | Sex* | Age**     | Place***                   | Province      | Date of collection (2019) | AIV H1N1 |    | AIV H2N8 |    | AIV H3N8 |    | AIV H9N2 |    | Human H1N1§ |    |
|----|------|-----------|----------------------------|---------------|---------------------------|----------|----|----------|----|----------|----|----------|----|-------------|----|
|    |      |           |                            |               |                           | HI       | NT | HI       | NT | HI       | NT | HI       | NT | HI          | NT |
| 1  | NA   | NA        | Chom Phon Cave             | Ratchaburi    | March 28                  | <20      | ND | 40       | 20 | <20      | ND | <20      | ND | <20         | ND |
| 2  | NA   | NA        | Chom Phon Cave             | Ratchaburi    | March 28                  | <20      | ND | 40       | 20 | <20      | ND | <20      | ND | <20         | ND |
| 3  | NA   | NA        | Chom Phon Cave             | Ratchaburi    | March 28                  | <20      | ND | 40       | 20 | <20      | ND | <20      | ND | <20         | ND |
| 4  | NA   | NA        | Chom Phon Cave             | Ratchaburi    | March 28                  | <20      | ND | 40       | 20 | <20      | ND | <20      | ND | <20         | ND |
| 5  | NA   | NA        | Chom Phon Cave             | Ratchaburi    | March 28                  | <20      | ND | <20      | ND | <20      | ND | 40       | 20 | <20         | ND |
| 6  | NA   | NA        | Chom Phon Cave             | Ratchaburi    | March 28                  | <20      | ND | <20      | ND | <20      | ND | <20      | ND | 80          | 20 |
| 7  | M    | Adult     | Wat Khao Somphot           | Lop Buri      | April 4-5                 | <20      | ND | 40       | 20 | <20      | ND | <20      | ND | <20         | ND |
| 8  | F    | Adult     | Wat Khao Somphot           | Lop Buri      | April 4-5                 | <20      | ND | 20       | 20 | <20      | ND | <20      | ND | <20         | ND |
| 9  | M    | Sub-adult | Wat Khao Somphot           | Lop Buri      | April 4-5                 | <20      | ND | 40       | 20 | <20      | ND | <20      | ND | <20         | ND |
| 10 | M    | Sub-adult | Wat Khao Somphot           | Lop Buri      | April 4-5                 | <20      | ND | 20       | 20 | <20      | ND | <20      | ND | <20         | ND |
| 11 | M    | Adult     | Wat Khao Somphot           | Lop Buri      | April 4-5                 | <20      | ND | 40       | 20 | <20      | ND | <20      | ND | <20         | ND |
| 12 | M    | Adult     | Wat Khao Somphot           | Lop Buri      | April 4-5                 | <20      | ND | 80       | 20 | <20      | ND | <20      | ND | <20         | ND |
| 13 | M    | Adult     | Wat Khao Somphot           | Lop Buri      | April 4-5                 | <20      | ND | 80       | 20 | <20      | ND | <20      | ND | <20         | ND |
| 14 | M    | NA        | Don Chao Pu Botanical Park | Amnat Charoen | April 8                   | <20      | ND | 40       | 20 | <20      | ND | <20      | ND | <20         | ND |
| 15 | M    | NA        | Don Chao Pu Botanical Park | Amnat Charoen | April 8                   | <20      | ND | <20      | ND | <20      | ND | 20       | 20 | <20         | ND |
| 16 | F    | NA        | Don Chao Pu Botanical Park | Amnat Charoen | April 8                   | <20      | ND | 40       | 20 | <20      | ND | <20      | ND | <20         | ND |
| 17 | M    | NA        | Don Chao Pu Botanical Park | Amnat Charoen | April 8                   | <20      | ND | 40       | 20 | <20      | ND | <20      | ND | <20         | ND |
| 18 | F    | NA        | Don Chao Pu Botanical Park | Amnat Charoen | April 8                   | <20      | ND | 20       | 20 | <20      | ND | <20      | ND | <20         | ND |
| 19 | F    | NA        | Don Chao Pu Botanical Park | Amnat Charoen | April 8                   | <20      | ND | 20       | 20 | <20      | ND | <20      | ND | <20         | ND |
| 20 | M    | Adult     | Kosumphi Forest Park       | Maha Sarakham | April 23-24               | <20      | ND | <20      | ND | <20      | ND | <20      | ND | 20          | 20 |
| 21 | M    | Sub-adult | Kosumphi Forest Park       | Maha Sarakham | April 23-24               | <20      | ND | <20      | ND | <20      | ND | 40       | 20 | <20         | ND |
| 22 | M    | Sub-adult | Kosumphi Forest Park       | Maha Sarakham | April 23-24               | <20      | ND | <20      | ND | <20      | ND | 40       | 20 | <20         | ND |
| 23 | F    | Sub-adult | Kosumphi Forest Park       | Maha Sarakham | April 23-24               | <20      | ND | <20      | ND | <20      | ND | 20       | 20 | <20         | ND |
| 24 | M    | Adult     | Kosumphi Forest Park       | Maha Sarakham | April 23-24               | <20      | ND | <20      | ND | <20      | ND | 20       | 20 | <20         | ND |
| 25 | M    | Adult     | Kosumphi Forest Park       | Maha Sarakham | April 23-24               | <20      | ND | <20      | ND | <20      | ND | 20       | 20 | <20         | ND |
| 26 | F    | Adult     | Khao Ngu Stone Park        | Ratchaburi    | April 23                  | <20      | ND | 40       | 20 | <20      | ND | <20      | ND | <20         | ND |
| 27 | M    | Adult     | Khao Ngu Stone Park        | Ratchaburi    | April 23                  | <20      | ND | 40       | 20 | <20      | ND | <20      | ND | <20         | ND |

| No  | Sex* | Age**     | Place***                        | Province     | Date of collection (2019) | AIV H1N1 |    | AIV H2N8 |    | AIV H3N8 |    | AIV H9N2 |     | Human H1N1§ |    |
|-----|------|-----------|---------------------------------|--------------|---------------------------|----------|----|----------|----|----------|----|----------|-----|-------------|----|
|     |      |           |                                 |              |                           | HI       | NT | HI       | NT | HI       | NT | HI       | NT  | HI          | NT |
| 28  | M    | Adult     | Khao Ngu Stone Park             | Ratchaburi   | April 23                  | <20      | ND | 20       | 20 | <20      | ND | <20      | ND  | <20         | ND |
| 29  | M    | Sub-adult | Wat Khao Bandai It              | Phetchaburi  | May 15                    | <20      | ND | <20      | ND | <20      | ND | <20      | ND  | 40          | 20 |
| 30  | M    | Sub-adult | Wat Khao Bandai It              | Phetchaburi  | May 15                    | <20      | ND | 20       | 20 | <20      | ND | <20      | ND  | <20         | ND |
| 31  | M    | Adult     | Wat Khao Thamom School          | Phetchaburi  | May 21                    | <20      | ND | <20      | ND | <20      | ND | 80       | 40  | <20         | ND |
| 32  | F    | Sub-adult | Wat Siri Chanthanimit Worawihan | Lop Buri     | May 22                    | <20      | ND | 40       | 20 | <20      | ND | <20      | ND  | <20         | ND |
| 33  | F    | Adult     | Wat Siri Chanthanimit Worawihan | Lop Buri     | May 22                    | <20      | ND | 40       | 20 | <20      | ND | <20      | ND  | <20         | ND |
| 34  | M    | Adult     | Wat Siri Chanthanimit Worawihan | Lop Buri     | May 22                    | <20      | ND | 20       | 20 | <20      | ND | <20      | ND  | <20         | ND |
| 35  | F    | Adult     | Wat Siri Chanthanimit Worawihan | Lop Buri     | May 22                    | <20      | ND | 40       | 20 | <20      | ND | <20      | ND  | <20         | ND |
| 36  | M    | Sub-adult | Wat Siri Chanthanimit Worawihan | Lop Buri     | May 22                    | <20      | ND | 40       | 20 | <20      | ND | <20      | ND  | <20         | ND |
| 37  | F    | Sub-adult | Wat Siri Chanthanimit Worawihan | Lop Buri     | May 22                    | <20      | ND | 40       | 20 | <20      | ND | <20      | ND  | <20         | ND |
| 38  | F    | Adult     | Wat Siri Chanthanimit Worawihan | Lop Buri     | May 22                    | <20      | ND | 20       | 20 | <20      | ND | <20      | ND  | <20         | ND |
| 39  | M    | Sub-adult | Wat Siri Chanthanimit Worawihan | Lop Buri     | May 22                    | <20      | ND | 20       | 20 | <20      | ND | <20      | ND  | <20         | ND |
| 40  | F    | Sub-adult | Wat Khuha Sawan                 | Phatthalung  | May 27-28                 | <20      | ND | 20       | 20 | <20      | ND | <20      | ND  | <20         | ND |
| 41  | F    | Sub-adult | Wat Khuha Sawan                 | Phatthalung  | May 27-28                 | <20      | ND | 40       | 20 | <20      | ND | <20      | ND  | <20         | ND |
| 42  | F    | Adult     | Wat Khuha Sawan                 | Phatthalung  | May 27-28                 | <20      | ND | 20       | 20 | <20      | ND | <20      | ND  | <20         | ND |
| 43  | M    | Adult     | Wat Khuha Sawan                 | Phatthalung  | May 27-28                 | <20      | ND | 20       | 20 | <20      | ND | <20      | ND  | <20         | ND |
| 44  | M    | Adult     | KaoNor-KaoKaew                  | Nakhon Sawan | May 27                    | <20      | ND | 40       | 20 | <20      | ND | <20      | ND  | <20         | ND |
| 45  | M    | Adult     | KaoNor-KaoKaew                  | Nakhon Sawan | May 27                    | <20      | ND | 20       | 20 | <20      | ND | <20      | ND  | <20         | ND |
| 46¶ | M    | Adult     | KaoNor-KaoKaew                  | Nakhon Sawan | May 27                    | 20       | 20 | 40       | 20 | <20      | ND | <20      | ND  | <20         | ND |
| 47  | M    | Adult     | KaoNor-KaoKaew                  | Nakhon Sawan | May 27                    | <20      | ND | 40       | 20 | <20      | ND | <20      | ND  | <20         | ND |
| 48  | M    | Adult     | KaoNor-KaoKaew                  | Nakhon Sawan | May 27                    | <20      | ND | <20      | ND | <20      | ND | 320      | 160 | <20         | ND |
| 49  | M    | Sub-adult | KaoNor-KaoKaew                  | Nakhon Sawan | May 27                    | <20      | ND | <20      | ND | <20      | ND | 20       | 20  | <20         | ND |
| 50  | M    | Adult     | KaoNor-KaoKaew                  | Nakhon Sawan | May 27                    | <20      | ND | <20      | ND | <20      | ND | 40       | 20  | <20         | ND |
| 51  | M    | Adult     | KaoNor-KaoKaew                  | Nakhon Sawan | May 27                    | <20      | ND | 40       | 20 | <20      | ND | <20      | ND  | <20         | ND |
| 52  | M    | Sub-adult | KaoNor-KaoKaew                  | Nakhon Sawan | May 27                    | <20      | ND | 20       | 20 | <20      | ND | <20      | ND  | <20         | ND |
| 53  | F    | Sub-adult | KaoNor-KaoKaew                  | Nakhon Sawan | May 27                    | <20      | ND | 40       | 20 | <20      | ND | <20      | ND  | <20         | ND |
| 54  | F    | Sub-adult | KaoNor-KaoKaew                  | Nakhon Sawan | May 27                    | <20      | ND | 40       | 20 | <20      | ND | <20      | ND  | <20         | ND |
| 55  | F    | Sub-adult | KaoNor-KaoKaew                  | Nakhon Sawan | May 27                    | <20      | ND | <20      | ND | <20      | ND | 20       | 20  | <20         | ND |
| 56  | M    | Sub-adult | Mueang SAO                      | Chon Buri    | June 4                    | 20       | 20 | <20      | ND | <20      | ND | <20      | ND  | <20         | ND |
| 57  | M    | Sub-adult | Mueang SAO                      | Chon Buri    | June 4                    | <20      | ND | 20       | 20 | <20      | ND | <20      | ND  | <20         | ND |
| 58¶ | M    | Adult     | Mueang SAO                      | Chon Buri    | June 4                    | 20       | 20 | 80       | 20 | <20      | ND | <20      | ND  | <20         | ND |
| 59  | M    | Adult     | Mueang SAO                      | Chon Buri    | June 4                    | <20      | ND | 40       | 20 | <20      | ND | <20      | ND  | <20         | ND |

| No  | Sex* | Age**     | Place***                     | Province     | Date of collection (2019) | AIV H1N1 |    | AIV H2N8 |    | AIV H3N8 |    | AIV H9N2 |    | Human H1N1§ |    |
|-----|------|-----------|------------------------------|--------------|---------------------------|----------|----|----------|----|----------|----|----------|----|-------------|----|
|     |      |           |                              |              |                           | HI       | NT | HI       | NT | HI       | NT | HI       | NT | HI          | NT |
| 60  | M    | Sub-adult | Mueang SAO                   | Chon Buri    | June 4                    | <20      | ND | 20       | 20 | <20      | ND | <20      | ND | <20         | ND |
| 61¶ | M    | Adult     | Mueang SAO                   | Chon Buri    | June 4                    | <20      | ND | 40       | 20 | <20      | ND | 20       | 20 | <20         | ND |
| 62¶ | F    | Sub-adult | Mueang SAO                   | Chon Buri    | June 4                    | 20       | 40 | 40       | 20 | <20      | ND | <20      | ND | <20         | ND |
| 63  | M    | Adult     | Mueang SAO                   | Chon Buri    | June 4                    | <20      | ND | 20       | 20 | <20      | ND | <20      | ND | <20         | ND |
| 64  | M    | Adult     | Mueang SAO                   | Chon Buri    | June 4                    | <20      | ND | 20       | 20 | <20      | ND | <20      | ND | <20         | ND |
| 65¶ | M    | Adult     | Mueang SAO                   | Chon Buri    | June 4                    | 20       | 40 | 40       | 20 | <20      | ND | <20      | ND | <20         | ND |
| 66¶ | F    | Sub-adult | Mueang SAO                   | Chon Buri    | June 4                    | 40       | 20 | <20      | ND | 40       | 20 | <20      | ND | <20         | ND |
| 67  | M    | Adult     | Mueang SAO                   | Chon Buri    | June 4                    | 20       | 20 | <20      | ND | <20      | ND | <20      | ND | <20         | ND |
| 68  | F    | Sub-adult | Mueang SAO                   | Chon Buri    | June 4                    | 20       | 20 | <20      | ND | <20      | ND | <20      | ND | <20         | ND |
| 69# | M    | Sub-adult | Mueang SAO                   | Chon Buri    | June 4                    | 20       | 20 | 40       | 20 | 20       | 20 | <20      | ND | <20         | ND |
| 70  | F    | Adult     | Wat Khao Samo Khon           | Lop Buri     | June 11                   | <20      | ND | 20       | 20 | <20      | ND | <20      | ND | <20         | ND |
| 71  | F    | Adult     | Wat Khao Samo Khon           | Lop Buri     | June 11                   | <20      | ND | 20       | 20 | <20      | ND | <20      | ND | <20         | ND |
| 72  | F    | Adult     | Wat Khao Samo Khon           | Lop Buri     | June 11                   | <20      | ND | 20       | 20 | <20      | ND | <20      | ND | <20         | ND |
| 73  | F    | Sub-adult | Wat Khao Samo Khon           | Lop Buri     | June 11                   | <20      | ND | 20       | 20 | <20      | ND | <20      | ND | <20         | ND |
| 74  | F    | Adult     | Wat Khao Samo Khon           | Lop Buri     | June 11                   | <20      | ND | 20       | 20 | <20      | ND | <20      | ND | <20         | ND |
| 75  | M    | Adult     | Wat Tham Pha Sawan Thammaram | Nakhon Sawan | June 24-25                | <20      | ND | <20      | ND | <20      | ND | 20       | 20 | <20         | ND |
| 76  | M    | Adult     | Wat Tham Pha Sawan Thammaram | Nakhon Sawan | June 24-25                | <20      | ND | 40       | 20 | <20      | ND | <20      | ND | <20         | ND |
| 77  | M    | Adult     | Wat Tham Pha Sawan Thammaram | Nakhon Sawan | June 24-25                | <20      | ND | 20       | 20 | <20      | ND | <20      | ND | <20         | ND |
| 78  | M    | Adult     | Wat Tham Pha Sawan Thammaram | Nakhon Sawan | June 24-25                | <20      | ND | 40       | 20 | <20      | ND | <20      | ND | <20         | ND |
| 79  | M    | Adult     | Wat Tham Pha Sawan Thammaram | Nakhon Sawan | June 24-25                | <20      | ND | 20       | 20 | <20      | ND | <20      | ND | <20         | ND |
| 80  | F    | Sub-adult | Wat Tham Pha Sawan Thammaram | Nakhon Sawan | June 24-25                | <20      | ND | <20      | ND | <20      | ND | 20       | 20 | <20         | ND |
| 81  | F    | Sub-adult | Wat Tham Pha Sawan Thammaram | Nakhon Sawan | June 24-25                | <20      | ND | 40       | 20 | <20      | ND | <20      | ND | <20         | ND |
| 82  | F    | Sub-adult | Wat Tham Pha Sawan Thammaram | Nakhon Sawan | June 24-25                | <20      | ND | 20       | 20 | <20      | ND | <20      | ND | <20         | ND |
| 83  | F    | Adult     | Mueangkhaen SAO              | Si Sa Ket    | June 25                   | <20      | ND | 20       | 20 | <20      | ND | <20      | ND | <20         | ND |
| 84  | F    | Adult     | Mueangkhaen SAO              | Si Sa Ket    | June 25                   | <20      | ND | 40       | 20 | <20      | ND | <20      | ND | <20         | ND |
| 85¶ | F    | Adult     | Mueangkhaen SAO              | Si Sa Ket    | June 25                   | <20      | ND | 20       | 20 | <20      | ND | <20      | ND | 40          | 20 |
| 86  | F    | Adult     | Mueangkhaen SAO              | Si Sa Ket    | June 25                   | <20      | ND | 20       | 20 | <20      | ND | <20      | ND | <20         | ND |
| 87¶ | F    | Adult     | Mueangkhaen SAO              | Si Sa Ket    | June 25                   | <20      | ND | 40       | 20 | <20      | ND | <20      | ND | 40          | 20 |
| 88  | F    | Adult     | Mueangkhaen SAO              | Si Sa Ket    | June 25                   | <20      | ND | 40       | 20 | <20      | ND | <20      | ND | <20         | ND |
| 89  | F    | Adult     | Mueangkhaen SAO              | Si Sa Ket    | June 25                   | <20      | ND | 40       | 20 | <20      | ND | <20      | ND | <20         | ND |
| 90¶ | F    | Adult     | Mueangkhaen SAO              | Si Sa Ket    | June 25                   | 20       | 20 | 80       | 20 | <20      | ND | <20      | ND | <20         | ND |
| 91  | F    | Adult     | Mueangkhaen SAO              | Si Sa Ket    | June 25                   | <20      | ND | 40       | 20 | <20      | ND | <20      | ND | <20         | ND |

| No   | Sex* | Age**     | Place***                       | Province   | Date of collection (2019) | AIV H1N1 |    | AIV H2N8 |    | AIV H3N8 |    | AIV H9N2 |    | Human H1N1§ |    |
|------|------|-----------|--------------------------------|------------|---------------------------|----------|----|----------|----|----------|----|----------|----|-------------|----|
|      |      |           |                                |            |                           | HI       | NT | HI       | NT | HI       | NT | HI       | NT | HI          | NT |
| 92   | F    | Adult     | Mueangkhaen SAO                | Si Sa Ket  | June 25                   | <20      | ND | 80       | 20 | <20      | ND | <20      | ND | <20         | ND |
| 93   | NA   | NA        | Mueangkhaen SAO                | Si Sa Ket  | June 25                   | <20      | ND | <20      | ND | <20      | ND | 80       | 20 | <20         | ND |
| 94   | NA   | NA        | Mueangkhaen SAO                | Si Sa Ket  | June 25                   | <20      | ND | 40       | 20 | <20      | ND | <20      | ND | <20         | ND |
| 95   | M    | Sub-adult | Wat Tham Phra Phothisat        | Saraburi   | July 9                    | <20      | ND | 20       | 20 | <20      | ND | <20      | ND | <20         | ND |
| 96¶  | M    | Adult     | Wat Tham Phra Phothisat        | Saraburi   | July 9                    | <20      | ND | 20       | 20 | <20      | ND | <20      | ND | 20          | 20 |
| 97   | F    | Sub-adult | Wat Tham Phra Phothisat        | Saraburi   | July 9                    | <20      | ND | 40       | 20 | <20      | ND | <20      | ND | <20         | ND |
| 98   | M    | Sub-adult | Wat Tham Phra Phothisat        | Saraburi   | July 9                    | <20      | ND | 20       | 20 | <20      | ND | <20      | ND | <20         | ND |
| 99   | F    | Adult     | Wat Tham Phra Phothisat        | Saraburi   | July 9                    | <20      | ND | 20       | 20 | <20      | ND | <20      | ND | <20         | ND |
| 100  | M    | Sub-adult | Wat Tham Phra Phothisat        | Saraburi   | July 9                    | <20      | ND | <20      | ND | <20      | ND | 20       | 20 | <20         | ND |
| 101  | M    | Sub-adult | Wat Tham Phra Phothisat        | Saraburi   | July 9                    | <20      | ND | 80       | 20 | <20      | ND | <20      | ND | <20         | ND |
| 102  | F    | Sub-adult | Wat Tham Phra Phothisat        | Saraburi   | July 9                    | <20      | ND | 20       | 20 | <20      | ND | <20      | ND | <20         | ND |
| 103  | F    | Sub-adult | Wat Tham Phra Phothisat        | Saraburi   | July 9                    | <20      | ND | 40       | 20 | <20      | ND | <20      | ND | <20         | ND |
| 104  | F    | Sub-adult | Wat Tham Phra Phothisat        | Saraburi   | July 9                    | <20      | ND | 20       | 20 | <20      | ND | <20      | ND | <20         | ND |
| 105  | M    | Adult     | Wat Tham Phra Phothisat        | Saraburi   | July 9                    | <20      | ND | 20       | 20 | <20      | ND | <20      | ND | <20         | ND |
| 106  | M    | Adult     | Wat Tham Phra Phothisat        | Saraburi   | July 9                    | <20      | ND | 20       | 20 | <20      | ND | <20      | ND | <20         | ND |
| 107  | M    | Adult     | Wat Tham Mongkhon Khao Changok | Phetchabun | July 20                   | <20      | ND | 40       | 20 | <20      | ND | <20      | ND | <20         | ND |
| 108¶ | F    | Adult     | Wat Tham Mongkhon Khao Changok | Phetchabun | July 20                   | <20      | ND | 40       | 20 | <20      | ND | 20       | 20 | <20         | ND |
| 109  | F    | Adult     | Wat Tham Mongkhon Khao Changok | Phetchabun | July 20                   | <20      | ND | 40       | 20 | <20      | ND | <20      | ND | <20         | ND |
| 110  | M    | Sub-adult | Wat Tham Mongkhon Khao Changok | Phetchabun | July 20                   | <20      | ND | 40       | 20 | <20      | ND | <20      | ND | <20         | ND |
| 111  | M    | Sub-adult | Wat Tham Mongkhon Khao Changok | Phetchabun | July 20                   | <20      | ND | 40       | 20 | <20      | ND | <20      | ND | <20         | ND |
| 112  | M    | Adult     | Wat Tham Mongkhon Khao Changok | Phetchabun | July 20                   | <20      | ND | 80       | 20 | <20      | ND | <20      | ND | <20         | ND |
| 113  | M    | Sub-adult | Wat Tham Mongkhon Khao Changok | Phetchabun | July 20                   | <20      | ND | 20       | 20 | <20      | ND | <20      | ND | <20         | ND |
| 114  | F    | Sub-adult | Wat Tham Mongkhon Khao Changok | Phetchabun | July 20                   | <20      | ND | 20       | 20 | <20      | ND | <20      | ND | <20         | ND |
| 115  | M    | Adult     | Wat Tham Mongkhon Khao Changok | Phetchabun | July 20                   | <20      | ND | 40       | 20 | <20      | ND | <20      | ND | <20         | ND |
| 116¶ | F    | Adult     | Wat Tham Mongkhon Khao Changok | Phetchabun | July 20                   | <20      | ND | 20       | 20 | <20      | ND | 20       | 20 | <20         | ND |
| 117¶ | F    | Sub-adult | Wat Tham Mongkhon Khao Changok | Phetchabun | July 20                   | <20      | ND | 20       | 20 | <20      | ND | 20       | 20 | <20         | ND |
| 118  | M    | Sub-adult | Wat Tham Mongkhon Khao Changok | Phetchabun | July 20                   | <20      | ND | 40       | 20 | <20      | ND | <20      | ND | <20         | ND |
| 119  | F    | Adult     | Bang Khun Thian District       | Bangkok    | August 6                  | <20      | ND | 40       | 20 | <20      | ND | <20      | ND | <20         | ND |

| No    | Sex* | Age**     | Place***                 | Province  | Date of collection (2019) | AIV H1N1 |    | AIV H2N8 |    | AIV H3N8 |    | AIV H9N2 |    | Human H1N1§ |    |
|-------|------|-----------|--------------------------|-----------|---------------------------|----------|----|----------|----|----------|----|----------|----|-------------|----|
|       |      |           |                          |           |                           | HI       | NT | HI       | NT | HI       | NT | HI       | NT | HI          | NT |
| 120   | M    | Adult     | Bang Khun Thian District | Bangkok   | August 6                  | <20      | ND | 40       | 20 | <20      | ND | <20      | ND | <20         | ND |
| 121   | M    | Sub-adult | Bang Khun Thian District | Bangkok   | August 6                  | <20      | ND | 20       | 20 | <20      | ND | <20      | ND | <20         | ND |
| 122¶  | F    | Adult     | Bang Khun Thian District | Bangkok   | August 6                  | 40       | 20 | 20       | 20 | <20      | ND | <20      | ND | <20         | ND |
| 123   | M    | Adult     | Bang Khun Thian District | Bangkok   | August 6                  | <20      | ND | <20      | ND | <20      | ND | 20       | 20 | <20         | ND |
| 124   | F    | Sub-adult | Wat Phrommawat           | Chon Buri | August 1-2                | <20      | ND | 40       | 20 | <20      | ND | <20      | ND | <20         | ND |
| 125   | F    | Sub-adult | Wat Phrommawat           | Chon Buri | August 1-2                | <20      | ND | 40       | 20 | <20      | ND | <20      | ND | <20         | ND |
| 126   | M    | Adult     | Ko Lanta Yai             | Krabi     | August 27                 | <20      | ND | <20      | ND | <20      | ND | 20       | 20 | <20         | ND |
| 127   | F    | Sub-adult | Ko Lanta Yai             | Krabi     | August 27                 | <20      | ND | 40       | 20 | <20      | ND | <20      | ND | <20         | ND |
| 128   | F    | Adult     | Klongtamru SAO           | Chon Buri | August 26-27              | <20      | ND | <20      | ND | <20      | ND | 20       | 20 | <20         | ND |
| Total |      |           |                          |           |                           | 11       |    | 102      |    | 2        |    | 23       |    | 6           |    |

\*: F, Female; M, Male; NA, not available.

\*\*\*: Sub-adult was defined as macaque with the age of 1-4 years, while the adult was defined as macaque with age >4 years; NA, not available.

\*\*\*: SAO, Subdistrict Administrative Organization.

§: AIV, avian influenza virus; Human, human influenza virus; HI, hemagglutination inhibition antibody titer; NT, neutralizing antibody titer; ND, not done. Both HI and NT titer of ≥20 were considered as seropositive. Only HI titer ≥20 was further determined for NT titer.

¶: Individual macaque gave seropositive results for both virus subtypes.

#: Individual macaque gave seropositive results for three virus subtypes.
